# Supplementary material for: Efficiency of integron cassette insertion in correct orientation is ensured by the interplay of the three unpaired features of attC recombination sites
Source: PubMed Central journal article supplement — Nucleic Acids Res. 2016 Aug 5;44(16):7792–803. doi: 10.1093/nar/gkw646 (PMC5027507; doi:10.1093/nar/gkw646), 2016-08-05
Supplement: supp_gkw646_nar-00918-v-2016-File008.pdf [file supp_gkw646_nar-00918-v-2016-File008.pdf]

**Supplementary Figure S1. Principle of suicidal conjugation assay and cassette orientation determination.** **A.** During suicidal conjugation, either the top (ts) or the bottom strand (bs) of the *attC* site is delivered into the recipient cell, where it can be resynthesized, but cannot be replicated as pSW plasmid replication absolutely requires the Pir protein. **B.** However, the resistance marker can be maintained by integrating the plasmid carrying the *attC* into the plasmid containing an *attI* site, present in the recipient strain. The recombination can occur either with the delivered strand of the plasmid, or the resynthesized complementary strand. The frequency of recombination events was calculated as described in Supplementary Material S3. **C.** Depending whether the recombination occurred in the bottom or in the top strand, the orientation of cassette insertion varies, which was determined by performing PCR reactions on the resulting co-integrates, as described in Supplementary Material S5.

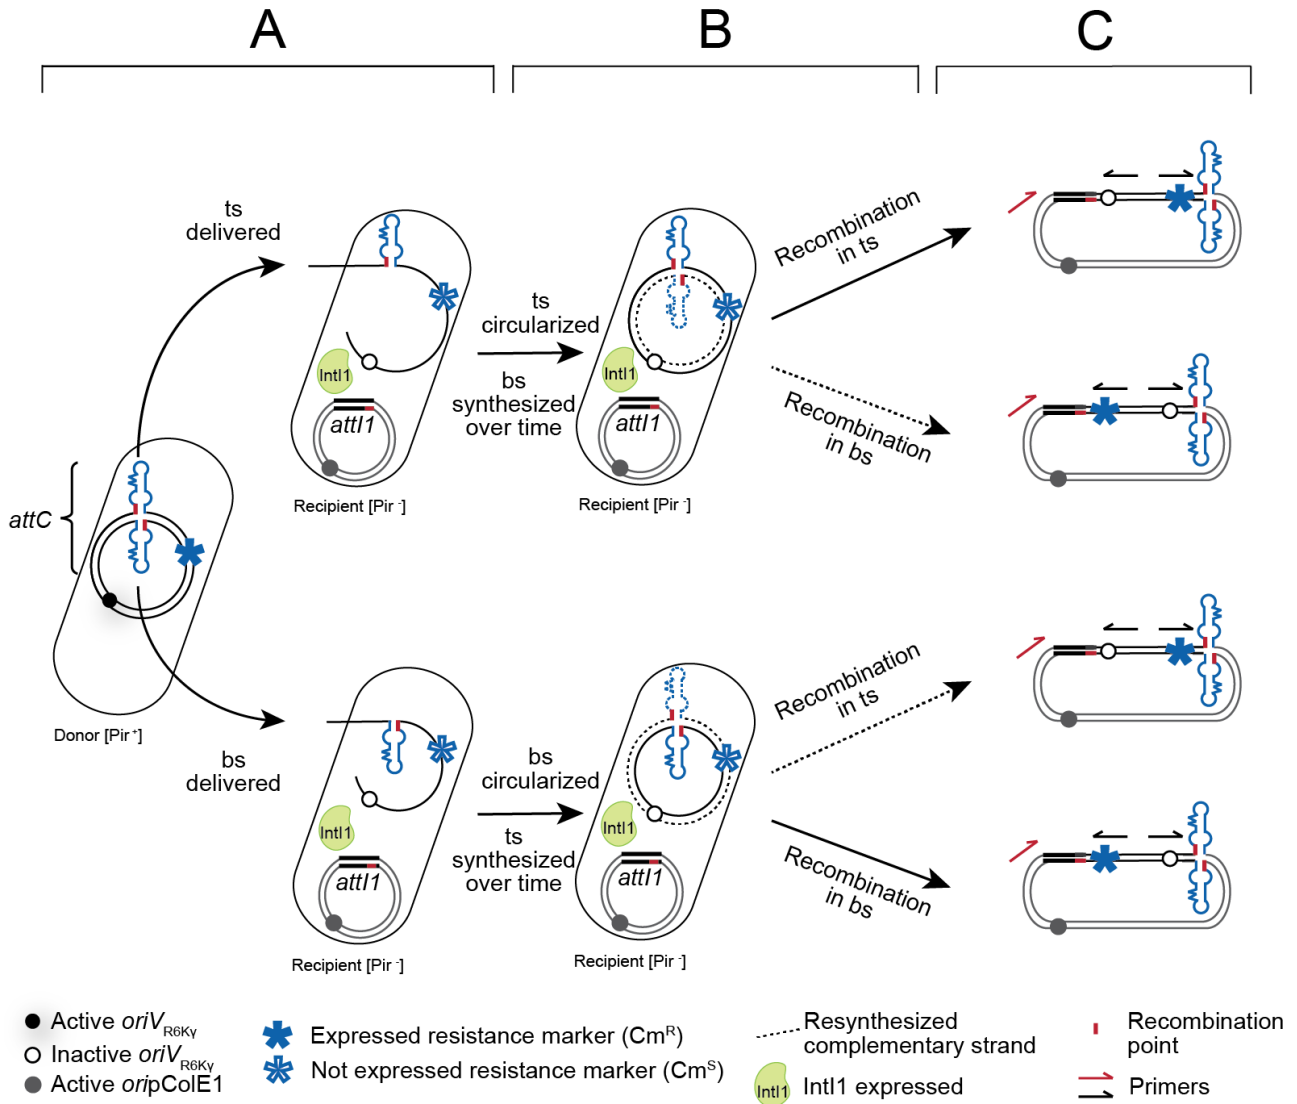

**Supplementary Figure S2.** The effect of R box sequence on strand selectivity. **A.** R box sequences of the tested mutants. **B-C.** The grey bars correspond to recombination frequencies of each strain: light green bars for recombination in the bottom strand; black bars for recombination in top strand. White cross-hatched bars correspond to the level of detection by PCR (see Supplementary Material S5), when recombination events of a particular strand were not observed. Error bars correspond to mean deviations. **B.** Recombination upon the delivery of the bottom strand (bs) of *attC* sites. **C.** Recombination upon the delivery of the top strand (ts) of *attC* sites.

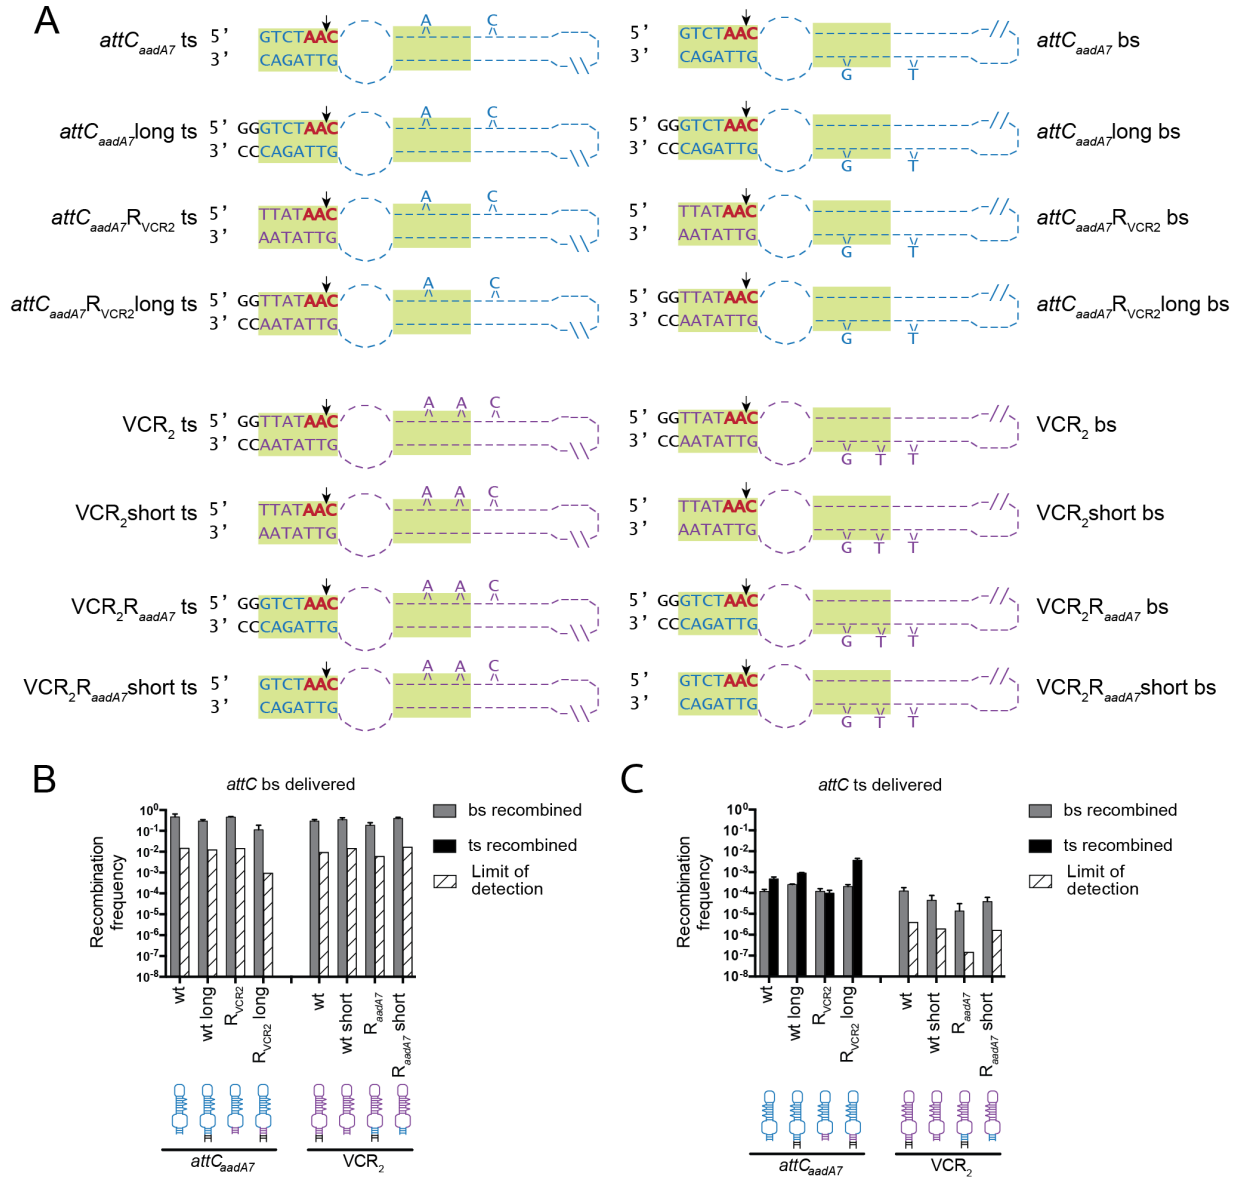

**Supplementary Figure S3. Schematic representation of possible synapses formed during an *attI1*×*attC* recombination. A. Possible synapse formation between an *attI1* site and a wild-type *attC* site, for both its top (ts) and bottom (bs) strands. B. Possible synapse formation between an *attI1* site and an *attC* site with inverted EHBs, for both its top and bottom strands.**

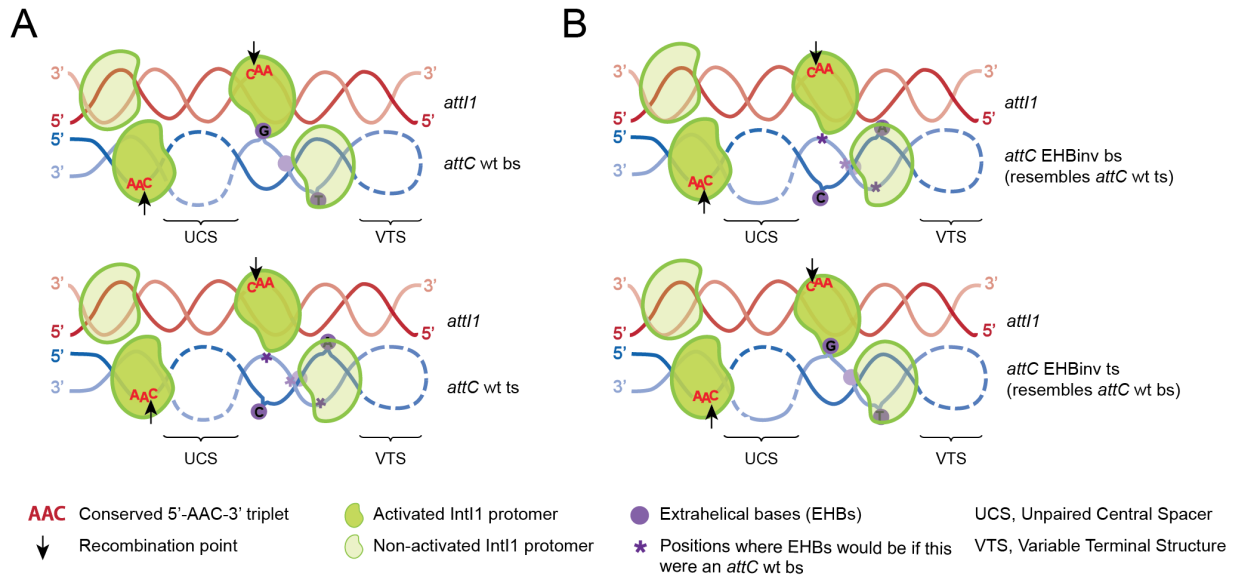

**Supplementary Table S1. Oligonucleotides used in this study. Sequences are given in 5' → 3' direction.**

**A. DNA oligonucleotides used in the *in vivo* conjugation assay to generate the *attC* sites.**

| Primer name, number          | Sequence                                                                                                |
|------------------------------|---------------------------------------------------------------------------------------------------------|
| VCR <sub>2</sub>             | Fw1 #2980<br>GATCCGGTTATAACGCCCGCCTAAGGGGCTGACAACGCACTACCACTAAAC<br>TCAAACACAACAACAGCAACCACCGCGGCTCAA   |
|                              | Fw2 #2981<br>GGGACTGGAAACGCCACGCGTTGACAGTCCCTCTTGAGGCGTTTGTATAA<br>CCG                                  |
|                              | Rev1 #2982<br>AATTCGGTTATAACAAACGCCTCAAGAGGGACTGTCAACGCGTGGCGTTTC<br>CAGTCCCATTGAGCCGCGGTGGTTGCTGTTGTTG |
|                              | Rev2 #2983<br>TGTTTGAGTTTAGTGGTAGTGCGTTGTCAGCCCCTTAGGCGGGCGTTATAA<br>CCG                                |
| <i>attC</i> <sub>aadA7</sub> | Fw #3849<br>AATTCGTCTAACAATTCATTCAAGCCGACGCCGCTTCGCGGCGCGGCTTAA<br>TTCAAGCGTTAGACG                      |
|                              | Rev #3850<br>GATCCGTCTAACGCTTGAATTAAGCCGCGCCGCGAAGCGGCGTTCGGCTTG<br>AATGAATTGTTAGACG                    |
| <i>attC</i> <sub>CATB3</sub> | Fw #3853<br>AATTCGTCTAACAATTCATCAAGCCGATGCCGCTTCGCGGCACGGCTTATT<br>TCAGGCGTTAGACG                       |
|                              | Rev #3854<br>GATCCGTCTAACGCCTGAAATAAGCCGTGCCGCGAAGCGGCATCGGCTTG<br>ATTGAATTGTTAGACG                     |
| <i>attC</i> <sub>aadA5</sub> | Fw #3855<br>AATTCGCCTAACTCGGCGTTCAAGCGGACGGGCTGCGCCCGCCGCTCAAC<br>TATGCGTTAGGCG                         |
|                              | Rev #3856<br>GATCCGCCTAACGCATAGTTGAGCGGCGGGCGCAGCCCCTCCGCTTGAAC<br>GCCGAGTTAGGCG                        |
| <i>attC</i> <sub>dfxB3</sub> | Fw #3857<br>AATTCGTTTAACTGGTCGCTCCAGCGGACGGCTTCGCCGCCGCTGAGCTA<br>GAGCGTTAAACG                          |
|                              | Rev #3858<br>GATCCGTTTAAACGCTCTAGCTCAGCGGGCGGCGAAGCCGTCCGCTGGAGC<br>GACCAGTTAAACG                       |
| VCR <sub>2</sub><br>ΔEHB     | Fw1 #2980<br>GATCCGGTTATAACGCCCGCCTAAGGGGCTGACAACGCACTACCACTAAAC<br>TCAAACACAACAACAGCAACCACCGCGGCTCAA   |
|                              | Fw2 #3859<br>TGGGACTGGAAACGCCACGCGTTGACAGCCCCTTAGGCGTTTGTATAACC<br>G                                    |
|                              | Rev1 #3860<br>AATTCGGTTATAACAAACGCCTAAGGGGCTGTCAACGCGTGGCGTTTCCAG<br>TCCCATTGAGCCGCGGTGGTTGCTGTTGTTG    |
|                              | Rev2 #2983<br>TGTTTGAGTTTAGTGGTAGTGCGTTGTCAGCCCCTTAGGCGGGCGTTATAA<br>CCG                                |
| VCR <sub>2</sub><br>ΔG16     | Fw1 #2980<br>GATCCGGTTATAACGCCCGCCTAAGGGGCTGACAACGCACTACCACTAAAC<br>TCAAACACAACAACAGCAACCACCGCGGCTCAA   |
|                              | Fw2 #3861<br>TGGGACTGGAAACGCCACGCGTTGACAGTCCCTCTTAGGCGTTTGTATAA<br>CCG                                  |
|                              | Rev1 #3862<br>AATTCGGTTATAACAAACGCCTAAGAGGGACTGTCAACGCGTGGCGTTTCC<br>AGTCCCATTGAGCCGCGGTGGTTGCTGTTGTTG  |
|                              | Rev2 #2983<br>TGTTTGAGTTTAGTGGTAGTGCGTTGTCAGCCCCTTAGGCGGGCGTTATAA<br>CCG                                |
| VCR <sub>2</sub><br>ΔT20     | Fw1 #2980<br>GATCCGGTTATAACGCCCGCCTAAGGGGCTGACAACGCACTACCACTAAAC<br>TCAAACACAACAACAGCAACCACCGCGGCTCAA   |
|                              | Fw2 #3863<br>TGGGACTGGAAACGCCACGCGTTGACAGTCCCTTAGGCGTTTGTATAA<br>CCG                                    |
|                              | Rev1 #3864<br>AATTCGGTTATAACAAACGCCTCAAGGGGACTGTCAACGCGTGGCGTTTCC<br>AGTCCCATTGAGCCGCGGTGGTTGCTGTTGTTG  |
|                              | Rev2 #2983<br>TGTTTGAGTTTAGTGGTAGTGCGTTGTCAGCCCCTTAGGCGGGCGTTATAA<br>CCG                                |
| VCR <sub>2</sub><br>ΔT24     | Fw1 #2980<br>GATCCGGTTATAACGCCCGCCTAAGGGGCTGACAACGCACTACCACTAAAC<br>TCAAACACAACAACAGCAACCACCGCGGCTCAA   |

|                                      |               |                                                                                           |
|--------------------------------------|---------------|-------------------------------------------------------------------------------------------|
|                                      | Fw2<br>#3865  | TGGGACTGGAAACGCCACGCGTTGACAGCCCTCTTGAGGCGTTTGTATAA<br>CCG                                 |
|                                      | Rev1<br>#3866 | AATTCGGTTATAACAAACGCCTCAAGAGGGCTGTCAACGCGTGGCGTTTCC<br>AGTCCCATTGAGCCGCGGTGGTTGCTGTTGTTG  |
|                                      | Rev2<br>#2983 | TGTTTGAGTTTAGTGGTAGTGCGTTGTCAGCCCCTTAGGCGGGCGTTATAA<br>CCG                                |
| VCR <sub>2</sub><br>EHBinv           | Fw1<br>#2984  | GATCCGTTATAACGCCCGCCTCAAGAGGGACTGACAACGCACTACCACTA<br>AACTCAAACACAACAACAGCAACCACCGCGGCTC  |
|                                      | Fw2<br>#2985  | AATGGGACTGGAAACGCCACGCGTTGACAGCCCCTTAGGCGTTTGTATAA<br>CCG                                 |
|                                      | Rev1<br>#2986 | AATTCGGTTATAACAAACGCCTAAGGGGCTGTCAACGCGTGGCGTTTCCAG<br>TCCCATTGAGCCGCGGTGGTTGCTGTTGTTGT   |
|                                      | Rev2<br>#2987 | TTGAGTTTAGTGGTAGTGCGTTGTCAGTCCCTCTTGAGGCGGGCGTTATAA<br>CCG                                |
| VCR <sub>2</sub><br>G16inv           | Fw1<br>#2988  | GATCCGTTATAACGCCCGCCTCAAGGGGCTGACAACGCACTACCACTAAA<br>CTCAAACACAACAACAGCAACCACCGCGGCTCAA  |
|                                      | Fw2<br>#2989  | TGGGACTGGAAACGCCACGCGTTGACAGTCCCTCTTAGGCGTTTGTATAA<br>CCG                                 |
|                                      | Rev1<br>#2990 | AATTCGGTTATAACAAACGCCTAAGAGGGACTGTCAACGCGTGGCGTTTCC<br>AGTCCCATTGAGCCGCGGTGGTTGCTGTTGTTGT |
|                                      | Rev2<br>#2991 | GTTTGAGTTTAGTGGTAGTGCGTTGTCAGCCCCTTAGGCGGGCGTTATAA<br>CCG                                 |
| VCR <sub>2</sub><br>T20inv<br>T24inv | Fw1<br>#2992  | GATCCGTTATAACGCCCGCCTAAGAGGGACTGACAACGCACTACCACTAA<br>ACTCAAACACAACAACAGCAACCACCGCGGCTCA  |
|                                      | Fw2<br>#2993  | ATGGGACTGGAAACGCCACGCGTTGACAGCCCCTTAGGCGTTTGTATAA<br>CCG                                  |
|                                      | Rev1<br>#2994 | AATTCGGTTATAACAAACGCCTCAAGGGGCTGTCAACGCGTGGCGTTTCCA<br>GTCCCATTGAGCCGCGGTGGTTGCTGTTGTTGT  |
|                                      | Rev2<br>#2995 | TTTGAGTTTAGTGGTAGTGCGTTGTCAGTCCCTCTTAGGCGGGCGTTATAA<br>CCG                                |
| VCR <sub>2</sub><br>VTSinv           | Fw1<br>#3867  | GATCCGTTATAACGCCCGCCTAAGGGGCTGACAACGCGTGGCGTTTCCA<br>GTCCCATTGAGCCGCGGTGGTTGCTGTTGTTGT    |
|                                      | Fw2<br>#3868  | TTTGAGTTTAGTGGTAGTGCGTTGACAGTCCCTCTTAGGCGTTTGTATAA<br>CCG                                 |
|                                      | Rev1<br>#3869 | AATTCGGTTATAACAAACGCCTCAAGAGGGACTGTCAACGCACTACCACTA<br>AACTCAAACACAACAACAGCAACCACCGCGGCT  |
|                                      | Rev2<br>#3870 | CAATGGGACTGGAAACGCCACGCGTTGTCAGCCCCTTAGGCGGGCGTTAT<br>AACCG                               |
| <i>attC</i> <sub>oxa2</sub><br>ΔEHB  | Fw<br>#2911   | GATCCGCCCAACGTTGAAGTAACCGGCGCTGCGCGTTTTATCGCGCAGC<br>GCCGGTACTGCCGGGTTGGGCGG              |
|                                      | Rev<br>#2912  | AATTCGCCCAACCGGCGAGTAACCGGCGCTGCGCGATAAAACCGCGCAG<br>CGCCGGTACTTCAACGTTGGGCG              |
| <i>attC</i> <sub>oxa2</sub><br>ΔG16  | Fw<br>#3871   | GATCCGCCCAACGTTGAAGTAACCGGCGCTGCGCGTTTTATCGCGCAGC<br>GTCCGAGTACTGCCGGGTTGGGCGG            |
|                                      | Rev<br>#3872  | AATTCGCCCAACCGGCGAGTAACCGGCGCTGCGCGATAAAACCGCGC<br>AGCGCCGGTACTTCAACGTTGGGCG              |
| <i>attC</i> <sub>oxa2</sub><br>ΔA20  | Fw<br>#3873   | GATCCGCCCAACGTTGAAGTAACCGGCGCTGCGCGTTTTATCGCGCAGC<br>GTCCGGTTGACTGCCGGGTTGGGCGG           |
|                                      | Rev<br>#3874  | AATTCGCCCAACCGGCGAGTCAACCGGCGCTGCGCGATAAAACCGCGC<br>AGCGCCGGTACTTCAACGTTGGGCG             |
| <i>attC</i> <sub>oxa2</sub><br>ΔT24  | Fw<br>#3875   | GATCCGCCCAACGTTGAAGTAACCGGCGCTGCGCGTTTTATCGCGCAGC<br>GCCGAGTTGACTGCCGGGTTGGGCGG           |
|                                      | Rev<br>#3876  | AATTCGCCCAACCGGCGAGTCAACTCGGCGCTGCGCGATAAAACCGCGC<br>AGCGCCGGTACTTCAACGTTGGGCG            |

|                                         |              |                                                                                    |
|-----------------------------------------|--------------|------------------------------------------------------------------------------------|
| <i>attC</i> <sub>oxa2</sub><br>G16inv   | Fw<br>#2905  | GATCCGCCCAACGTTGAAGTCAACCGGCGCTGCGCGGTTTTATCGCGCAG<br>CGTCCGAGTTACTGCCGGGTTGGGCGG  |
|                                         | Rev<br>#2906 | AATTCGCCCCAACCCGGCAGTAACTCGGACGCTGCGCGATAAAACCGCGC<br>AGCGCCGGTTGACTTCAACGTTGGGCG  |
| <i>attC</i> <sub>oxa2</sub><br>A20inv   | Fw<br>#2907  | GATCCGCCCAACGTTGAAGTAACTCGGCGCTGCGCGGTTTTATCGCGCAG<br>CGTCCGTTGACTGCCGGGTTGGGCGG   |
|                                         | Rev<br>#2908 | AATTCGCCCCAACCCGGCAGTAACTCGGACGCTGCGCGATAAAACCGCGC<br>AGCGCCGAGTTACTTCAACGTTGGGCG  |
| <i>attC</i> <sub>oxa2</sub><br>T24inv   | Fw<br>#2909  | GATCCGCCCAACGTTGAAGTAACTCGGACGCTGCGCGGTTTTATCGCGCAG<br>CGCCGAGTTGACTGCCGGGTTGGGCGG |
|                                         | Rev<br>#2910 | AATTCGCCCCAACCCGGCAGTAACTCGGCGCTGCGCGATAAAACCGCGC<br>AGCGTCCGGTTACTTCAACGTTGGGCG   |
| <i>attC</i> <sub>oxa2</sub><br>UCSinv   | Fw<br>#2913  | GATCCGCCCAACCCGGCAGTAACTCGGCGCTGCGCGGTTTTATCGCGCAGC<br>GTCCGAGTTGACTTCAACGTTGGGCGG |
|                                         | Rev<br>#2914 | AATTCGCCCCACGTTGAAGTCAACTCGGACGCTGCGCGATAAAACCGCGC<br>AGCGCCGGTTACTGCCGGGTTGGGCG   |
| <i>attC</i> <sub>oxa2</sub><br>VTSinv   | Fw<br>#2926  | GATCCGCCCAACGTTGAAGTAACTCGGCGCTGCGCGATAAAACCGCGCAGC<br>GTCCGAGTTGACTGCCGGGTTGGGCGG |
|                                         | Rev<br>#2927 | AATTCGCCCCAACCCGGCAGTAACTCGGACGCTGCGCGGTTTTATCGCG<br>CAGCGCCGGTTACTTCAACGTTGGGCG   |
| <i>attC</i> <sub>aadA7</sub><br>ΔEHB    | Fw<br>#3563  | GATCCGTCTAACGCTTGAATTAAGCCGCGCCGCGAAGCGGCGCGGCTTAA<br>TGAATTGTTAGACG               |
|                                         | Rev<br>#3564 | AATTCGTCTAACAATTCATTAAGCCGCGCCGCTTCGCGGCGCGGCTTAATT<br>CAAGCGTTAGACG               |
| <i>attC</i> <sub>aadA7</sub><br>ΔG16    | Fw<br>#3567  | GATCCGTCTAACGCTTGAATTAAGCCGCGCCGCGAAGCGGCGTTCGGCTTA<br>ATGAATTGTTAGACG             |
|                                         | Rev<br>#3568 | AATTCGTCTAACAATTCATTAAGCCGACGCCGCTTCGCGGCGCGGCTTAAT<br>TCAAGCGTTAGACG              |
| <i>attC</i> <sub>aadA7</sub><br>ΔT23    | Fw<br>#3571  | GATCCGTCTAACGCTTGAATTAAGCCGCGCCGCGAAGCGGCGCGGCTTGA<br>ATGAATTGTTAGACG              |
|                                         | Rev<br>#3572 | AATTCGTCTAACAATTCATTCAAGCCGCGCCGCTTCGCGGCGCGGCTTAAT<br>TCAAGCGTTAGACG              |
| <i>attC</i> <sub>aadA7</sub><br>EHBinv  | Fw<br>#3565  | GATCCGTCTAACGCTTGAATTCATTAAGCCGACGCCGCGAAGCGGCGCGGCTT<br>AATGAATTGTTAGACG          |
|                                         | Rev<br>#3566 | AATTCGTCTAACAATTCATTAAGCCGCGCCGCTTCGCGGCGTTCGGCTTGAA<br>TTCAAGCGTTAGACG            |
| <i>attC</i> <sub>aadA7</sub><br>G16inv  | Fw<br>#3569  | GATCCGTCTAACGCTTGAATTCATTAAGCCGCGCCGCGAAGCGGCGTTCGGCTT<br>AATGAATTGTTAGACG         |
|                                         | Rev<br>#3570 | AATTCGTCTAACAATTCATTAAGCCGACGCCGCTTCGCGGCGCGGCTTGAA<br>TTCAAGCGTTAGACG             |
| <i>attC</i> <sub>aadA7</sub><br>T23inv  | Fw<br>#3573  | GATCCGTCTAACGCTTGAATTAAGCCGACGCCGCGAAGCGGCGCGGCTTG<br>AATGAATTGTTAGACG             |
|                                         | Rev<br>#3574 | AATTCGTCTAACAATTCATTCAAGCCGCGCCGCTTCGCGGCGTTCGGCTTAA<br>TTCAAGCGTTAGACG            |
| <i>attC</i> <sub>aadA7</sub><br>T20supp | Fw<br>#3559  | AATTCGTCTAACAATTCATTCAAGACCGACGCCGCTTCGCGGCGCGGCTTA<br>ATTCAAGCGTTAGACG            |
|                                         | Rev<br>#3560 | GATCCGTCTAACGCTTGAATTAAGCCGCGCCGCGAAGCGGCGTTCGGTCTT<br>GAATGAATTGTTAGACG           |
| <i>attC</i> <sub>aadA7</sub><br>UCSinv  | Fw<br>#3575  | GATCCGTCTAACAATTCATTAAGCCGCGCCGCGAAGCGGCGTTCGGCTTGAA<br>TTCAAGCGTTAGACG            |
|                                         | Rev<br>#3576 | AATTCGTCTAACGCTTGAATTCATTAAGCCGACGCCGCTTCGCGGCGCGGCTTA<br>ATGAATTGTTAGACG          |
| <i>attC</i> <sub>aadA7</sub><br>VTSinv  | Fw<br>#3581  | GATCCGTCTAACGCTTGAATTAAGCCGCGCCGCTTCGCGGCGTTCGGCTTG<br>AATGAATTGTTAGACG            |

|                                                             |            |                                                                                            |
|-------------------------------------------------------------|------------|--------------------------------------------------------------------------------------------|
|                                                             | Rev #3582  | AATTCGTCTAACAATTCATTCAAGCCGACGCCGCGAAGCGGGCGGGCTTAA<br>TTCAAGCGTTAGACG                     |
| <i>attC<sub>aadA7</sub></i><br>long                         | Fw #4169   | AATTCGGGTCTAACAATTCATTCAAGCCGACGCCGCTTCGCGGGCGGGCTT<br>AATTCAAGCGTTAGACCCG                 |
|                                                             | Rev #4170  | GATCCGGGTCTAACGCTTGAATTAAGCCGCGCCGCGAAGCGGGCGTCCGGCT<br>TGAATGAATTGTTAGACCCG               |
| <i>attC<sub>aadA7</sub></i><br><i>R<sub>VCR2</sub></i>      | Fw #3929   | AATTCCTTATAACAATTCATTCAAGCCGACGCCGCTTCGCGGGCGGGCTTAA<br>TCAAGCGTTATAAG                     |
|                                                             | Rev #3930  | GATCCTTATAACGCTTGAATTAAGCCGCGCCGCGAAGCGGGCGTCCGGCTGA<br>ATGAATTGTTATAAG                    |
| <i>attC<sub>aadA7</sub></i><br><i>R<sub>VCR2</sub></i> long | Fw #3381   | GATCCGGTTATAACGCTTGAATTAAGCCGCGCCGCGAAGCGGGCGTCCGGCT<br>TGAATGAATTGTTATAACCG               |
|                                                             | Rev #3382  | AATTCGGTTATAACAATTCATTCAAGCCGACGCCGCTTCGCGGGCGGGCTT<br>AATTCAAGCGTTATAACCG                 |
| <i>VCR<sub>2</sub></i><br>short                             | Fw1 #4165  | AATTCCTTATAACAACGCCTCAAGAGGGACTGTCAACGCGTGGCGTTTCCA<br>GTCCCATTGAGCCGCGGTGGTTGCTGTTGTTG    |
|                                                             | Fw2 #4166  | TGTTTGAGTTTAGTGGTAGTGCGTTGTCAGCCCCTTAGGGGGCGTTATAA<br>G                                    |
|                                                             | Rev1 #4167 | GATCCTTATAACGCCCGCCTAAGGGGCTGACAACGCACTACCACTAAACTC<br>AAACACAACAACAGCAACCACCGCGGCTCAAT    |
|                                                             | Rev2 #4168 | GGGACTGGAAACGCCACGCGTTGACAGTCCCTCTTGAGGCGTTTGTATAA<br>G                                    |
| <i>VCR<sub>2</sub></i><br><i>R<sub>aadA7</sub></i>          | Fw1 #3939  | AATTCGGGTCTAACAACGCCTCAAGAGGGACTGTCAACGCGTGGCGTTTC<br>CAGTCCCATTGAGCCGCGGTGGTTGCTGTTGTTG   |
|                                                             | Fw2 #3940  | TGTTTGAGTTTAGTGGTAGTGCGTTGTCAGCCCCTTAGGGGGCGTTAGAC<br>CCG                                  |
|                                                             | Rev1 #3941 | GATCCGGGTCTAACGCCCGCCTAAGGGGCTGACAACGCACTACCACTAAA<br>CTCAAACAACAACAACAGCAACCACCGCGGCTCAAT |
|                                                             | Rev2 #3942 | GGGACTGGAAACGCCACGCGTTGACAGTCCCTCTTGAGGCGTTTGTAGAC<br>CCG                                  |
| <i>VCR<sub>2</sub></i><br><i>R<sub>aadA7</sub></i> short    | Fw1 #4171  | AATTCGTCTAACAACGCCTCAAGAGGGACTGTCAACGCGTGGCGTTTCCA<br>GTCCCATTGAGCCGCGGTGGTTGCTGTTGTTG     |
|                                                             | Fw2 #4172  | TGTTTGAGTTTAGTGGTAGTGCGTTGTCAGCCCCTTAGGGGGCGTTAGAC<br>G                                    |
|                                                             | Rev1 #4173 | GATCCGTCTAACGCCCGCCTAAGGGGCTGACAACGCACTACCACTAAACTC<br>AAACACAACAACAGCAACCACCGCGGCTCAAT    |
|                                                             | Rev2 #4174 | GGGACTGGAAACGCCACGCGTTGACAGTCCCTCTTGAGGCGTTTGTAGAC<br>G                                    |

**B. DNA oligonucleotides used to identify the orientation of cassette insertion**

| Primer name | Sequence                 |
|-------------|--------------------------|
| SWbegin     | CCGTACAGGTATTTATTCGGCG   |
| SWend       | CCTCACTAAAGGGAACAAAAGCTG |
| MFD         | CGCCAGGGTTTTCCAGTCAC     |

**C. DNA oligonucleotides used in the Electrophoretic Mobility Shift Assays (EMSA)**

| Primer name                           | Sequence                                                                               |
|---------------------------------------|----------------------------------------------------------------------------------------|
| <i>oxa2<sub>wt</sub>_bs</i> _EMSA     | GGATCCGCCCAACGTTGAAGTAACCGGCGCTGCGCGGTTTTATCGCG<br>CAGCGTCCGAGTTGACTGCCGGTTGGGCGGAATTC |
| <i>oxa2<sub>wt</sub>_ts</i> _EMSA     | GAATTCCGCCCAACCCGGCAGTCAACTCGGACGCTGCGCGATAAAAC<br>CGCGCAGCGCCGTTACTTCAACGTTGGGCGGATCC |
| <i>oxa2<sub>EHBdel</sub>_bs</i> _EMSA | GGATCCGCCCAACGTTGAAGTAACCGGCGCTGCGCGGTTTTATCGCG<br>CAGCGCCGTTACTGCCGGTTGGGCGGAATTC     |

|                       |                                                                                          |
|-----------------------|------------------------------------------------------------------------------------------|
| oxa2_EHBdel_ts_EMSA   | GAATTCGGCCCAACCCGGCAGTAACCGGGCGCTGCGCGATAAAACCGC<br>GCAGCGCCGGTTACTTCAACGTTGGGCGGATCC    |
| oxa2_EHBinvs_bs_EMSA  | GGATCCGGCCCAACGTTGAAGTCAACTCGGACGCTGCGCGGTTTTATC<br>GCGCAGCGCCGGTTACTGCCGGGTTGGGCGGAATTC |
| aadA7_wt_bs_EMSA      | GGATCCGTCTAACGCTTGAATTAAGCCGCGCCGCGAAGCGGCGTCCG<br>CTTGAATGAATTGTTAGACGAATTC             |
| aadA7_wt_ts_EMSA      | GAATTCGTCTAACCAATTCATTCAAGCCGACGCCGCTTCGCGGCGCGGC<br>TTAATTCAAGCGTTAGACGGATCC            |
| aadA7_EHBinvs_bs_EMSA | GGATCCGTCTAACGCTTGAATTAAGCCGACGCCGCGAAGCGGCGCGC<br>GCTTAATGAATTGTTAGACGAATTC             |
| aadA7_EHBinvs_ts_EMSA | GAATTCGTCTAACCAATTCATTCAAGCCGCGCCGCTTCGCGGCGTCCGCT<br>TGAATTCAAGCGTTAGACGGATCC           |

**Supplementary Table S2.** Plasmids used in this study.

BOT, bottom strand of the *attC* site is delivered upon the conjugation of the plasmid; TOP, top strand of the *attC* site is delivered upon the conjugation of the plasmid.

| Plasmid number | Plasmid description                                | Plasmid properties and construction                                             |
|----------------|----------------------------------------------------|---------------------------------------------------------------------------------|
| p3938          | pBAD:: <i>int1</i>                                 | <i>oriColE1</i> ; [Carb <sup>R</sup> ] (1)                                      |
| p929           | pSU38Δ:: <i>att1</i>                               | <i>oriP15A</i> ; [Km <sup>R</sup> ] (2)                                         |
| p4116          | pSW23T:: <i>attC</i> <sub>aadA7</sub> T23inv (BOT) | <i>oriV<sub>R6KY</sub></i> , <i>oriT<sub>RP4</sub></i> ; [Cm <sup>R</sup> ] (3) |
| p4117          | pSW23T:: <i>attC</i> <sub>aadA7</sub> T23inv (TOP) | <i>oriV<sub>R6KY</sub></i> , <i>oriT<sub>RP4</sub></i> ; [Cm <sup>R</sup> ] (3) |
| pC510          | pSW23T::VCR <sub>2</sub> (BOT)                     | Annealing of primers and cloning into p4116                                     |
| pC514          | pSW23T::VCR <sub>2</sub> (TOP)                     | Annealing of primers and cloning into p4117                                     |
| pD060          | pSW23T:: <i>attC</i> <sub>aadA7</sub> (BOT)        | Annealing of primers and cloning into p4116                                     |
| pD059          | pSW23T:: <i>attC</i> <sub>aadA7</sub> (TOP)        | Annealing of primers and cloning into p4117                                     |
| pD823          | pSW23T:: <i>attC</i> <sub>CATB3</sub> (BOT)        | Annealing of primers and cloning into p4116                                     |
| pD824          | pSW23T:: <i>attC</i> <sub>CATB3</sub> (TOP)        | Annealing of primers and cloning into p4117                                     |
| pD044          | pSW23T:: <i>attC</i> <sub>aadA5</sub> (BOT)        | Annealing of primers and cloning into p4116                                     |
| pD043          | pSW23T:: <i>attC</i> <sub>aadA5</sub> (TOP)        | Annealing of primers and cloning into p4117                                     |
| pD046          | pSW23T:: <i>attC</i> <sub>dfrB3</sub> (BOT)        | Annealing of primers and cloning into p4116                                     |
| pD045          | pSW23T:: <i>attC</i> <sub>dfrB3</sub> (TOP)        | Annealing of primers and cloning into p4117                                     |
| p3652          | pSW23T:: <i>attC</i> <sub>ereA2</sub> (BOT)        | Constructed in a previous study (3)                                             |
| p4393          | pSW23T:: <i>attC</i> <sub>ereA2</sub> (TOP)        | Constructed in a previous study (3)                                             |
| pC302          | pSW23T:: <i>attC</i> <sub>oxa2</sub> (BOT)         | Constructed in a previous study (3)                                             |
| pC303          | pSW23T:: <i>attC</i> <sub>oxa2</sub> (TOP)         | Constructed in a previous study (3)                                             |
| pD056          | pSW23T::VCR <sub>2</sub> ΔEHB (BOT)                | Annealing of primers and cloning into p4116                                     |



|       |                                             |                                             |
|-------|---------------------------------------------|---------------------------------------------|
| pD055 | pSW23T::VCR <sub>2</sub> ΔEHB (TOP)         | Annealing of primers and cloning into p4117 |
| pD050 | pSW23T::VCR <sub>2</sub> ΔG16 (BOT)         | Annealing of primers and cloning into p4116 |
| pD049 | pSW23T::VCR <sub>2</sub> ΔG16 (TOP)         | Annealing of primers and cloning into p4117 |
| pD052 | pSW23T::VCR <sub>2</sub> ΔT20 (BOT)         | Annealing of primers and cloning into p4116 |
| pD051 | pSW23T::VCR <sub>2</sub> ΔT20 (TOP)         | Annealing of primers and cloning into p4117 |
| pD054 | pSW23T::VCR <sub>2</sub> ΔT24 (BOT)         | Annealing of primers and cloning into p4116 |
| pD053 | pSW23T::VCR <sub>2</sub> ΔT24 (TOP)         | Annealing of primers and cloning into p4117 |
| pC511 | pSW23T::VCR <sub>2</sub> EHBinv (BOT)       | Annealing of primers and cloning into p4116 |
| pC515 | pSW23T::VCR <sub>2</sub> EHBinv (TOP)       | Annealing of primers and cloning into p4117 |
| pC512 | pSW23T::VCR <sub>2</sub> G16inv (BOT)       | Annealing of primers and cloning into p4116 |
| pC516 | pSW23T::VCR <sub>2</sub> G16inv (TOP)       | Annealing of primers and cloning into p4117 |
| p4160 | pSW23T::VCR <sub>2</sub> T20inv (BOT)       | Constructed in a previous study (3)         |
| p4161 | pSW23T::VCR <sub>2</sub> T20inv (TOP)       | Constructed in a previous study (3)         |
| p4132 | pSW23T::VCR <sub>2</sub> T24inv (BOT)       | Constructed in a previous study (3)         |
| p4177 | pSW23T::VCR <sub>2</sub> T24inv (TOP)       | Constructed in a previous study (3)         |
| pC513 | pSW23T::VCR <sub>2</sub> T20invT24inv (BOT) | Annealing of primers and cloning into p4116 |
| pC517 | pSW23T::VCR <sub>2</sub> T20invT24inv (TOP) | Annealing of primers and cloning into p4117 |
| p3427 | pSW23T::VCR <sub>2</sub> UCSinv (BOT)       | Constructed in a previous study (3)         |
| pD899 | pSW23T::VCR <sub>2</sub> UCSinv (TOP)       | Constructed in a previous study (3)         |
| pD058 | pSW23T::VCR <sub>2</sub> VTSinv (BOT)       | Annealing of primers and cloning into p4116 |
| pD057 | pSW23T::VCR <sub>2</sub> VTSinv (TOP)       | Annealing of primers and cloning into p4117 |
| pC650 | pSW23T::attC <sub>oxa2</sub> ΔEHB (BOT)     | Annealing of primers and cloning into p4116 |
| pC395 | pSW23T::attC <sub>oxa2</sub> ΔEHB (TOP)     | Annealing of primers and cloning into p4117 |
| pC651 | pSW23T::attC <sub>oxa2</sub> ΔG16 (BOT)     | Annealing of primers and cloning into p4116 |
| pC652 | pSW23T::attC <sub>oxa2</sub> ΔG16 (TOP)     | Annealing of primers and cloning into p4117 |
| pC653 | pSW23T::attC <sub>oxa2</sub> ΔA20 (BOT)     | Annealing of primers and cloning into p4116 |
| pC654 | pSW23T::attC <sub>oxa2</sub> ΔA20 (TOP)     | Annealing of primers and cloning into p4117 |
| pC655 | pSW23T::attC <sub>oxa2</sub> ΔT24 (BOT)     | Annealing of primers and cloning into p4116 |
| pC656 | pSW23T::attC <sub>oxa2</sub> ΔT24 (TOP)     | Annealing of primers and cloning into p4117 |
| pD900 | pSW23T::attC <sub>oxa2</sub> EHBinv (BOT)   | Constructed in a previous study (3)         |
| p4439 | pSW23T::attC <sub>oxa2</sub> EHBinv (TOP)   | Constructed in a previous study (3)         |

|       |                                                       |                                             |
|-------|-------------------------------------------------------|---------------------------------------------|
| pC293 | pSW23T::attC <sub>oxa2</sub> G16inv (BOT)             | Annealing of primers and cloning into p4116 |
| pC392 | pSW23T::attC <sub>oxa2</sub> G16inv (TOP)             | Annealing of primers and cloning into p4117 |
| pC294 | pSW23T::attC <sub>oxa2</sub> A20inv (BOT)             | Annealing of primers and cloning into p4116 |
| pC393 | pSW23T::attC <sub>oxa2</sub> A20inv (TOP)             | Annealing of primers and cloning into p4117 |
| pC295 | pSW23T::attC <sub>oxa2</sub> T24inv (BOT)             | Annealing of primers and cloning into p4116 |
| pC394 | pSW23T::attC <sub>oxa2</sub> T24inv (TOP)             | Annealing of primers and cloning into p4117 |
| pC297 | pSW23T::attC <sub>oxa2</sub> UCSinv (BOT)             | Annealing of primers and cloning into p4116 |
| pC396 | pSW23T::attC <sub>oxa2</sub> UCSinv (TOP)             | Annealing of primers and cloning into p4117 |
| pC298 | pSW23T::attC <sub>oxa2</sub> VTSinv (BOT)             | Annealing of primers and cloning into p4116 |
| pC397 | pSW23T::attC <sub>oxa2</sub> VTSinv (TOP)             | Annealing of primers and cloning into p4117 |
| pD807 | pSW23T::attC <sub>aadA7</sub> ΔEHB (BOT)              | Annealing of primers and cloning into p4116 |
| pD808 | pSW23T::attC <sub>aadA7</sub> ΔEHB (TOP)              | Annealing of primers and cloning into p4117 |
| pD803 | pSW23T::attC <sub>aadA7</sub> ΔG16(BOT)               | Annealing of primers and cloning into p4116 |
| pD804 | pSW23T::attC <sub>aadA7</sub> ΔG16(TOP)               | Annealing of primers and cloning into p4117 |
| pD805 | pSW23T::attC <sub>aadA7</sub> ΔT23(BOT)               | Annealing of primers and cloning into p4116 |
| pD806 | pSW23T::attC <sub>aadA7</sub> ΔT23(TOP)               | Annealing of primers and cloning into p4117 |
| pD813 | pSW23T::attC <sub>aadA7</sub> EHBinv (BOT)            | Annealing of primers and cloning into p4116 |
| pD814 | pSW23T::attC <sub>aadA7</sub> EHBinv (TOP)            | Annealing of primers and cloning into p4117 |
| pD809 | pSW23T::attC <sub>aadA7</sub> G16inv (BOT)            | Annealing of primers and cloning into p4116 |
| pD810 | pSW23T::attC <sub>aadA7</sub> G16inv (TOP)            | Annealing of primers and cloning into p4117 |
| pD811 | pSW23T::attC <sub>aadA7</sub> T23inv (BOT)            | Annealing of primers and cloning into p4116 |
| pD812 | pSW23T::attC <sub>aadA7</sub> T23inv (TOP)            | Annealing of primers and cloning into p4117 |
| pD819 | pSW23T::attC <sub>aadA7</sub> T20supp (BOT)           | Annealing of primers and cloning into p4116 |
| pD820 | pSW23T::attC <sub>aadA7</sub> T20supp (TOP)           | Annealing of primers and cloning into p4117 |
| pD815 | pSW23T::attC <sub>aadA7</sub> UCSinv (BOT)            | Annealing of primers and cloning into p4116 |
| pD816 | pSW23T::attC <sub>aadA7</sub> UCSinv (TOP)            | Annealing of primers and cloning into p4117 |
| pD817 | pSW23T::attC <sub>aadA7</sub> VTSinv (BOT)            | Annealing of primers and cloning into p4116 |
| pD818 | pSW23T::attC <sub>aadA7</sub> VTSinv (TOP)            | Annealing of primers and cloning into p4117 |
| pE932 | pSW23T::attC <sub>aadA7</sub> long (BOT)              | Annealing of primers and cloning into p4116 |
| pE931 | pSW23T::attC <sub>aadA7</sub> long (TOP)              | Annealing of primers and cloning into p4117 |
| pE612 | pSW23T::attC <sub>aadA7</sub> R <sub>VCR2</sub> (BOT) | Annealing of primers and cloning into p4116 |

|       |                                                                    |                                             |
|-------|--------------------------------------------------------------------|---------------------------------------------|
| pE613 | pSW23T:: <i>attC</i> <sub>aadA7</sub> R <sub>VCR2</sub> (TOP)      | Annealing of primers and cloning into p4117 |
| pC299 | pSW23T:: <i>attC</i> <sub>aadA7</sub> R <sub>VCR2</sub> long (BOT) | Annealing of primers and cloning into p4116 |
| pC518 | pSW23T:: <i>attC</i> <sub>aadA7</sub> R <sub>VCR2</sub> long (TOP) | Annealing of primers and cloning into p4117 |
| pE930 | pSW23T::VCR <sub>2</sub> short (BOT)                               | Annealing of primers and cloning into p4116 |
| pE929 | pSW23T::VCR <sub>2</sub> short (TOP)                               | Annealing of primers and cloning into p4117 |
| pE622 | pSW23T::VCR <sub>2</sub> R <sub>aadA7</sub> (BOT)                  | Annealing of primers and cloning into p4116 |
| pE623 | pSW23T::VCR <sub>2</sub> R <sub>aadA7</sub> (TOP)                  | Annealing of primers and cloning into p4117 |
| pE934 | pSW23T::VCR <sub>2</sub> R <sub>aadA7</sub> short (BOT)            | Annealing of primers and cloning into p4116 |
| pE933 | pSW23T::VCR <sub>2</sub> R <sub>aadA7</sub> short (TOP)            | Annealing of primers and cloning into p4117 |

### Supplementary Material S1. Bacterial strains and media

Bacterial strains used in this study are DH5 $\alpha$ ,  $\Pi$ 1, and  $\beta$ 2163 (4). Plasmids are described in the Supporting Table S2. *Escherichia coli* strains were grown in Luria-Bertani (LB) broth at 37°C. Antibiotics were used at the following concentrations: chloramphenicol (Cm), 25  $\mu$ g/ml; kanamycin (Km), 25  $\mu$ g/ml; carbenicillin (Carb), 100  $\mu$ g/ml. Thymidine (Thy) and diaminopimelic acid (DAP) were supplemented when necessary to a final concentration of 0.3 mM. To induce the P<sub>BAD</sub> promoter, arabinose (Ara) was added to a final concentration of 2mg/ml; to repress it, glucose (Glc) was added to a final concentration of 10mg/ml.

### Supplementary Material S2. attC site folding.

In this work, by attC site sequence we mean the sequence between R' and R'' (including them), the variable 4bp of the R' being complementary to their counterparts in the R''. In fact, this fully complementary sequence corresponds to a cassette-associated attC site: upon integration into an attI, the part of the R' of the attC site that is localized in the 5' moiety relative to the recombination point (Fig.1C, to the left of the arrow in the ss-attC bs and ss-attC ts) becomes cleaved from the rest of the site, and the R box of the integrated attC site inherits this 5' moiety from the attI sequence (Fig.1C, to the right of the arrow in the ds-attI1). Upon excision, the complementary sequence is once again reconstituted. For the VCR<sub>2</sub>, we added two extra bases on each extremity of the site, to obtain an exact copy of the one that was studied before (3, 5) (see Figure 2B).

The structures of folded top and bottom strands of attC sites are represented in Fig.3B. All structures were obtained by RNAfold program from the ViennaRNA2 package (6) with the set of DNA-folding parameters derived from Mathews *et al.* (2004) (7), using the -p option to compute the partition function and plot the predicted structure, as well as the -c option for adding a constraint to pair the R' and R'', and L' and L'' sequences, respectively. We have used this last option to represent the structures that are most likely to be recombinogenic, instead of alternative favourable, but non-recombinogenic structures that could be formed (8). Indeed, integrase binding stabilizes attC sites and favors their recombination *in vitro* and *in vivo* (9), thus constraining the R and L boxes to pair, as seen in the crystal structure of VchInt1A bound to two VCR2 sites (10). Even though in some cases the structure given by RNAfold does not comply with the imposed constraint (as in the case of the incompletely paired L box of attC<sub>aadA7</sub>), it is likely that *in vivo*, the boxes will become fully paired upon integrase binding.

### Supplementary Material S3. Suicidal conjugation assay.

This assay was previously developed (2) and implemented (3, 5) for the study of attC site recombination. It consists of delivering one strand of a plasmid, carrying either the top or the bottom strand of an attC site, into a recipient strain expressing Int11 integrase and capable of performing an attI1 $\times$ attC reaction (Fig.4). The donor strain  $\beta$ 2163 requires DAP to grow in rich medium, and contains the RP4 conjugative transfer system and the *pir* gene on its chromosome. The latter allows the replication of a pSW23T plasmid with a *pir*-dependent origin of replication oriVR6K $\gamma$ (4), which carries an RP4 transfer origin, an attC site and a chloramphenicol resistance marker. Depending on the pSW23T-based vector used for cloning, the strand transferred by  $\beta$ 2163 during conjugation carries either a bottom strand of the attC site (p4116 as vector) or a top strand (p4117 as vector). The recipient DH5 $\alpha$  strain expresses the Int11 integrase from a pBAD plasmid (p3938) and carries a pSU38 $\Delta$  plasmid containing an attI1 site (p929), but is unable to maintain the replication of the *pir*-dependent pSW23T plasmid that is transferred into the recipient by conjugation. The only way to maintain its replication and express the encoded chloramphenicol resistance marker is to insert pSW23T as a cassette into the pSU38 $\Delta$  plasmid through attI1 $\times$ attC recombination.

For this assay, the donor and the recipient strains were grown overnight with the corresponding antibiotics and other chemicals (Km, Cm and DAP for the donor; Km, Carb and Glc for the recipient), then diluted 1:100 with the corresponding antibiotics and other chemicals (Km and DAP for the donor; Km and Ara for the recipient) and grown until the OD<sub>600</sub>=0.4 to 0.5. Then, 1ml of donor and 1ml of recipient cultures were mixed, centrifuged, and the pellet was spread on a 0.45 $\mu$ m filter placed on a LB-agarose media supplemented with DAP and Ara, for an overnight conjugation. The filter was then resuspended in 5ml LB media, after which serial 1:10 dilutions were made by the "easySpiral Dilute<sup>®</sup>" automatic serial diluter and plater. 50 $\mu$ l of the initial solution and of the 10<sup>-2</sup> dilution were exponentially plated on LB-

agarose media supplemented with Cm; 50µl of the 10<sup>-4</sup> dilution was exponentially plated on LB-agarose media supplemented with Km. This patented and approved exponential plating method allows the user to plate several dilutions on a single plate. It is compatible with the “Scan<sup>®</sup> 300” automatic colony counter, which was used to count the number of colony-forming units (CFU) on each plate and determine the initial bacterial concentrations. The recombination frequency was calculated as the ratio of recombinant CFUs [Cm<sup>R</sup>] to the total number of recipient CFUs [Km<sup>R</sup>]. For each strain, the overall recombination frequency is a mean of 3 independent experiments, and error bars represent the mean deviation (Fig.5 and 7).

#### **Supplementary Material S4.** Test of conjugation efficiency.

To prove that the differences in recombination frequencies were not due to differences in conjugation, we verified that for all strains, their conjugation frequencies were comparable, and indeed they were between 8×10<sup>-2</sup> and 4×10<sup>-1</sup>. It was performed by a similar protocol as described above, but using a P11 strain as recipient, which is *pir*<sup>+</sup> and allows pSW23T plasmid replication (this strain has to be supplemented with Thymine). Conjugation frequencies were calculated as the ratio of [Cm<sup>R</sup>] colonies to the total number of recipient colonies.

#### **Supplementary Material S5.** Determination of cassette insertion orientation

The recombination frequencies in the bottom and top strands, as well as the corresponding mean deviations were deduced by determining the orientation of cassette insertion for at least 20 independent clones for each strain (Fig.2C and D and Fig.3). For each clone, the orientation of cassette insertion was determined by performing two PCR reactions, as previously described(3) (for primer sequences, see the Supplementary Table S1B): the first reaction with SW23begin/MFD primers produced a product only when the recombination took place in the delivered *attC* strand (in the bottom strand, 530bp; in the top, 520bp); the second reaction with SW23end/MFD primers produced a product only when the recombination took place in the resynthesized *attC* strand (in the top strand when the bottom strand is delivered, 240bp; in the bottom strand when the top strand is delivered, 210bp). When recombination events were detected in both bottom and top strands, the values of grey and black bars were calculated by multiplying the overall recombination frequency of this mutant by the proportion of recombination events happening correspondingly in the bottom and in the top strands, as determined by the PCR reactions. When recombination events were detected only in one strand, the corresponding recombination frequency was attributed entirely to recombination in that strand, and a limit of detection was calculated for the other strand. This limit of detection is due to the limited number of CFUs that could be tested for each mutant, and corresponds to minimal frequency of recombination that could possibly be detected by this method. It is calculated as the overall recombination frequency divided by the number of CFUs tested.

1. Demarre,G., Frumerie,C., Gopaul,D.N. and Mazel,D. (2007) Identification of key structural determinants of the IntI1 integron integrase that influence attC x attI1 recombination efficiency. *Nucleic Acids Research*, **35**, 6475–6489.
2. Biskri,L., Bouvier,M., Guerout,A.-M., Boissard,S. and Mazel,D. (2005) Comparative study of class 1 integron and Vibrio cholerae superintegron integrase activities. *Journal of Bacteriology*, **187**, 1740–1750.
3. Bouvier,M., Ducos-Galand,M., Loot,C., Bikard,D. and Mazel,D. (2009) Structural features of single-stranded integron cassette attC sites and their role in strand selection. *PLoS Genet*, **5**, e1000632.
4. Demarre,G., Guerout,A.-M., Matsumoto-Mashimo,C., Rowe-Magnus,D.A., Marlière,P. and Mazel,D. (2005) A new family of mobilizable suicide plasmids based on broad host range R388 plasmid (IncW) and RP4 plasmid (IncPalph) conjugative machineries and their cognate Escherichia coli host strains. *Research in Microbiology*, **156**, 245–255.

5. Bouvier,M., Demarre,G. and Mazel,D. (2005) Integron cassette insertion: a recombination process involving a folded single strand substrate. *EMBO J.*, **24**, 4356–4367.
6. Lorenz,R., Bernhart,S.H., Höner Zu Siederdisen,C., Tafer,H., Flamm,C., Stadler,P.F. and Hofacker,I.L. (2011) ViennaRNA Package 2.0. *Algorithms Mol Biol*, **6**, 26.
7. Mathews,D.H., Disney,M.D., Childs,J.L., Schroeder,S.J., Zuker,M. and Turner,D.H. (2004) Incorporating chemical modification constraints into a dynamic programming algorithm for prediction of RNA secondary structure. *Proc. Natl. Acad. Sci. U.S.A.*, **101**, 7287–7292.
8. Loot,C., Bikard,D., Rachlin,A. and Mazel,D. (2010) Cellular pathways controlling integron cassette site folding. *EMBO J.*, **29**, 2623–2634.
9. Loot,C., Parissi,V., Escudero,J.A., Amarir-Bouhram,J., Bikard,D. and Mazel,D. (2014) The Integron Integrase Efficiently Prevents the Melting Effect of Escherichia coli Single-Stranded DNA-Binding Protein on Folded attC Sites. *Journal of Bacteriology*, **196**, 762–771.
10. MacDonald,D., Demarre,G., Bouvier,M., Mazel,D. and Gopaul,D.N. (2006) Structural basis for broad DNA-specificity in integron recombination. *Nature*, **440**, 1157–1162.
